1 **Title**

2 Chronic Cochlear Implantation with and without Electric Stimulation in a Mouse Model  
3 Induces Robust Cochlear Influx of CX3CR1<sup>+/-GFP</sup> Macrophages.

4  
5 **Authors**

6 Alexander D. Claussen<sup>1,2</sup>, René Vielman Quevedo<sup>1,3</sup>, Timon Higgins<sup>1</sup>, Brian Mostaert<sup>1</sup>,  
7 Muhammad Taifur Rahman<sup>1</sup>, Jonathon Kirk<sup>4</sup>, Keiko Hirose<sup>5</sup>, Marlan R. Hansen<sup>1</sup>

- 8  
9 1. Department of Otolaryngology – Head and Neck Surgery, University of Iowa, Iowa  
10 City, IA 52242, USA.  
11 2. Current affiliation: Department of Otolaryngology – Head and Neck Surgery,  
12 University of California San Diego, San Diego, CA 92103, USA.  
13 3. Current affiliation: Department of Biomedical Sciences, Creighton University, Omaha,  
14 NE 68178, USA.  
15 4. Cochlear Americas, Centennial, CO 80124, USA.  
16 5. Department of Otolaryngology, Head and Neck Surgery, Washington University  
17 School of Medicine, St. Louis, MO 63110, USA

18  
19 Corresponding Author: Alexander D. Claussen, MD. 200 W Arbor Drive San Diego, CA  
20 92103, [aclaussen@ucsd.edu](mailto:aclaussen@ucsd.edu)

21  
22 **Declaration of Interest**

23 This research was partially funded by and performed in collaboration with Cochlear  
24 Americas as research partners, with no financial or non-financial influence dependent  
25 on the outcome or reporting and sharing of data. MRH is a co-founder and Chief  
26 Medical Officer of iotaMotion Inc with equity interest. JK is employed by the Cochlear  
27 Corporation.

28  
29 **Abbreviations**

30 AI – acute insertion  
31 ChI – chronic insertion  
32 CI – cochlear implant  
33 CL – clinical level  
34 FBR – foreign body response  
35 GFP – green fluorescent protein  
36 HS – high stimulation  
37 LS – low stimulation  
38 LW – lateral wall  
39 NRT – neural response telemetry  
40 PBS – phosphate buffered saline  
41 ROI – region of interest  
42 RC – Rosenthal's canal  
43 ST – scala tympani  
44 YFP – yellow fluorescent protein

45 **Abstract**

46 **Background:**

47 Cochlear implantation is an effective auditory rehabilitation strategy for those with  
48 profound hearing loss, including those with residual low frequency hearing through use  
49 of hybrid cochlear implantation techniques. Post-mortem studies demonstrate the nearly  
50 ubiquitous presence of intracochlear fibrosis and neo-ossification following cochlear  
51 implantation. Current evidence suggests post-implantation intracochlear fibrosis is  
52 associated with delayed loss of residual acoustic hearing in hybrid cochlear implant (CI)  
53 recipients and may also negatively influence outcomes in traditional CI recipients. This  
54 study examined the contributions of surgical trauma, foreign body response and electric  
55 stimulation to intracochlear fibrosis and the innate immune response to cochlear  
56 implantation and the hierarchy of these contributions.

57 **Methods:**

58 Normal hearing CX3CR1<sup>+GFP</sup> mice underwent either round window opening (sham),  
59 acute CI insertion or chronic CI insertion with no, low- or high-level electric stimulation.  
60 Electric stimulation levels were based on neural response telemetry (NRT), beginning  
61 post-operative day 7 for 4 hours per day. Subjects (n=3 per timepoint) were sacrificed at  
62 4 hours, 1,4,7,8,11,14 and 21 days. An unimplanted group (n=3) served as controls.  
63 Cochleae were harvested at each time-point and prepared for immunohistochemistry  
64 with confocal imaging. The images were analyzed to obtain CX3CR1<sup>+</sup> macrophage cell  
65 number and density in the lateral wall (LW), scala tympani (ST) and Rosenthal's canal  
66 (RC).

67 **Results:**

68 A ST peri-implant cellular infiltrate and fibrosis occurred exclusively in the chronically  
69 implanted groups starting on day 7 with a concurrent infiltration of CX3CR1<sup>+</sup>  
70 macrophages not seen in the other groups. CX3CR1<sup>+</sup> macrophage infiltration was  
71 seen in the LW and RC in all experimental groups within the first week, being most  
72 prominent in the 3 chronically implanted groups during the second and third week.  
73 There were no significant differences in macrophage infiltration related to levels of  
74 electric stimulation.

75 **Conclusions:**

76 The cochlear immune response was most prominent in the presence of chronic  
77 cochlear implantation, regardless of electric stimulation level. Further, the development  
78 of intracochlear ST fibrosis was dependent on the presence of the indwelling CI foreign  
79 body. An innate immune response was evoked by surgical trauma alone (sham and  
80 acute CI groups) to a lesser degree. These data suggest that cochlear inflammation and  
81 intrascalar fibrosis after cochlear implantation are largely dependent on the presence of  
82 a chronic indwelling foreign body and are not critically dependent on electrical  
83 stimulation. Also, these data support a role for surgical trauma in inciting the initial  
84 innate immune response.

85

86 **Keywords**

87 cochlear implantation; hearing preservation; cochlear inflammation; cochlear  
88 macrophages; foreign body response; electro-acoustic stimulation

89

## 90 **1 Introduction**

91

92 Conventional and hybrid cochlear implantation is an effective treatment for patients with  
93 severe and profound hearing loss, including those with preserved low frequency  
94 hearing. Advances in cochlear implant (CI) design, surgical technique and programming  
95 strategies have improved the hearing performance in CI recipients (Mitchell-Innes et al.,  
96 2018; Roche & Hansen, 2015). However, several issues hampering CI efficacy remain,  
97 including the development of a post-implantation intracochlear tissue response which  
98 may contribute to poorer outcomes in both traditional and hybrid CI recipients  
99 (Kamakura & Nadol, 2016; Quesnel et al., 2016; Scheperle et al., 2017). The clinical  
100 significance of addressing these issues is increased when considering the anticipated  
101 near doubling of the combined conventional and hybrid CI candidate population in the  
102 next 40 years for those age 60 years and older (Goman et al., 2018).

103

104 Fibrosis and neo-ossification with inflammatory cell infiltration in the human cochlea has  
105 been well described in post-implantation cadaveric temporal bone studies, occurring in  
106 up to 96% of specimens in some series (Foggia et al., 2019). This heterotopic tissue  
107 response is often most robust in the peri-implant region of the scala tympani (ST)  
108 forming a 'fibrous sheath' around the CI, but is sometimes seen to extend distal to the  
109 implant tip and into other scala (Linthicum et al., 2017; Nadol et al., 2014; Seyyedi &  
110 Nadol, 2014). A similar pattern of post-implantation cochlear tissue response has been  
111 seen in several animal models of cochlear implantation, including guinea pig, cat,  
112 mouse and sheep (Clark et al., 1975; Claussen et al., 2019; Kaufmann et al., 2020;  
113 O'Leary et al., 2013). Deleterious CI outcomes have been associated with the cochlear  
114 tissue response and neo-ossification, including poorer word recognition scores  
115 (Kamakura & Nadol, 2016), impedance increases with subsequent poorer battery life  
116 and decreased dynamic range (Needham et al., 2020; Wilk et al., 2016) and loss of  
117 residual acoustic hearing after cochlear implantation (Quesnel et al., 2016; Scheperle et  
118 al., 2017).

119

120 A wide variety of inflammatory cells, including lymphocytes, macrophages, eosinophils  
121 and peri-implant foreign body giant cells are consistently seen within the intracochlear  
122 tissue response as well as other parts of the cochlea (O'Malley et al., 2017). Recent  
123 observations from cadaveric temporal bones of previously implanted subjects have  
124 demonstrated the presence of macrophages of varying morphologies within the scalae  
125 as well as other regions of the cochlea, including Rosenthal's canal (RC), the osseus  
126 spiral lamina and vestibular epithelium (Okayasu et al., 2019, 2020). These  
127 observations are limited to the longer post-implantation time-points seen in cadaveric  
128 temporal bones, but they demonstrate the presence of a persistent cochlear  
129 inflammatory infiltrate following cochlear implantation that may contribute to the  
130 formation of the intracochlear tissue response. The initial innate immune and  
131 inflammatory response to cochlear implantation is still poorly understood as are the  
132 relative contributions of the initial inciting events, including insertional trauma,  
133 autologous tissue packing, electric stimulation, foreign body response (FBR) to CI  
134 materials and likely other genetic and environmental pre-dispositions (Ishai et al., 2017;  
135 O'Leary et al., 2013; Rowe et al., 2016). Understanding of this initial inflammatory

136 response and contributing factors will be important in the development of strategies to  
137 mitigate the intracochlear tissue response and improve CI efficacy.

138  
139 This study utilizes our previously published mouse model of chronic cochlear  
140 implantation with electric stimulation in a CX3CR1<sup>+GFP</sup> reporter mouse to study the  
141 initial innate immune response to cochlear implantation (Claussen et al., 2019).  
142 CX3CR1 is the receptor to the chemokine, fractalkine (CX3CL1) and is expressed in  
143 monocytes, macrophages, microglia, NK cells and some T cells. (Jung et al., 2000). In  
144 the mouse cochlea, CX3CR1<sup>+</sup> cells are observed routinely and comprise a population  
145 of highly inducible resident cochlear macrophages (Hirose et al., 2005; Sato et al.,  
146 2008). Prior studies in CX3CR1<sup>+GFP</sup> mice, in which one copy of the CX3CR1 gene is  
147 replaced with a GFP reporter gene, have shown cochlear migration of CX3CR1<sup>+</sup>  
148 macrophages in response to ototoxic and hair cell injury (Hirose et al., 2014). Further,  
149 CX3CR1 knockout studies have demonstrated a protective role of CX3CR1<sup>+</sup> monocytes  
150 and macrophages following cochlear insult (Kaur et al., 2015; Sato et al., 2010).

151  
152 Our main objective was to observe the initial, innate immune response to cochlear  
153 implantation at several timepoints by tracking the accumulation of CX3CR1<sup>+</sup>  
154 macrophages within the cochlea. Additionally, we evaluated the relative contributions of  
155 several factors to the resultant cochlear immune response, including round window  
156 opening, insertional trauma, chronic placement of the CI foreign body and varied levels  
157 of electric stimulation.

## 158 159 **2 Methods**

### 160 161 *2.1 Animals*

162 This study utilized adult 8-12 week old heterozygous CX3CR1<sup>+GFP</sup> mice on a C57BL/6J  
163 background. An approximately equal mix of male and female animals were used. A  
164 subset of subjects were heterozygous for Thy1<sup>+YFP</sup>, in which spiral ganglion neurons  
165 express YFP. However, in an effort to maximize utilization of the available CX3CR1<sup>+GFP</sup>  
166 mice offspring, some subjects with a wildtype Thy1<sup>+/+</sup> were used. No homozygous  
167 CX3CR1<sup>GFP/GFP</sup> or Thy1<sup>YFP/YFP</sup> subjects were used in this study. Genotyping was  
168 performed for CX3CR1 and Thy1 using standard PCR of genomic DNA from tail  
169 samples (Feng et al., 2000; Jung et al., 2000). Five experimental groups (n=3 per time-  
170 point) comprised this study: **Sham Surgery**, the approach to the round window niche  
171 was made, opening the round window but not inserting a CI; **Acute Insertion (AI)**, the  
172 round window was opened and a CI briefly placed and removed; **Chronic Insertion**  
173 **(ChI)**, full implantation of a CI without electric stimulation; **Low Stimulation (LS)**, full CI  
174 implantation with low level electric stimulation starting on post-operative day 7; **High**  
175 **Stimulation (HS)**, full CI implantation with high level electric stimulation starting on  
176 post-operative day 7. Surgery was performed exclusively on left ears through a round  
177 window approach with a custom 3 half-banded electrode CI (Cochlear Ltd., AUS), as  
178 previously described (Claussen et al., 2019). Mice were followed for varying timepoints  
179 until sacrifice and cochlear histology, including 4, 24 and 96 hours, 7, 11, 14, and 21  
180 days post-operatively (**Figure 1** depicts the experimental timeline). The Low and High  
181 Stimulation groups were not included at the 4, 24 and 96 hour timepoints as this

182 condition was identical to the chronic insertion group prior to electric stimulation start on  
183 day 7. The Sham Surgery and Acute Insertion groups were not followed at days 8,11  
184 and 21 and day 21, respectively, as interim analysis showed no significant changes in  
185 cochlea histology at other timepoints. Three mice (n=3) were included at each timepoint  
186 for all groups. A separate control group (n=3) included mice who did not undergo  
187 surgery. The study protocol was approved by the University of Iowa Institutional Animal  
188 Care and Use Committee.

189

## 190 *2.2 Electric stimulation, impedance measurements and neural response telemetry* 191 *(NRT)*

192 Impedance measurements, NRT and electric stimulation programming were performed  
193 in Custom Sound EP 4.2 (Cochlear Ltd., AUS) in a procedure identical to that previously  
194 published (Claussen et al., 2019). Chronic Insertion, Low Stimulation and High  
195 Stimulation groups underwent Impedance and NRT threshold measurements for each  
196 separate electrode immediately prior to implantation, immediately post-operatively and  
197 at least weekly thereafter. Electric stimulation was performed by designing a MAP with a  
198 dynamic range of 1 between threshold and comfort levels. All functioning electrodes  
199 (impedance  $\leq 35k\Omega$ ) were shorted together during stimulation using a software  
200 patch in Custom Sound EP 4.2 (Cochlear Ltd., AUS). This strategy allowed uniform  
201 electric stimulation while mice were connected to the CI processor in previously  
202 described stimulation cages for 5 hours per day, 5 days a week starting on post-  
203 operative day 7 (Claussen et al., 2019). The Low Stimulation and High Stimulation  
204 groups were programmed to a “threshold” and “comfort” level at 30CL below NRT  
205 threshold and behavioral response threshold, respectively. The MAP was re-adjusted  
206 weekly according to any changes in electrode functioning or NRT threshold  
207 measurement changes. Within the parameters of the custom CI and emulator system  
208 used, 0 CL corresponds to 17.5  $\mu\text{A}$  and 0.44 nC/phase and 255 CL to 1750  $\mu\text{A}$  and  
209 43.75 nC/phase.

210

## 211 *2.3 Histology*

212 Left cochleae were harvested at the final respective timepoint for each subject and  
213 perfusion fixed with 4% paraformaldehyde. Cochleae were decalcified in 0.1M EDTA  
214 (pH 7.5) solution on a rotator that is changed regularly. Confirmation of the end point of  
215 decalcification was performed by combining equal parts of 5% Ammonium Hydroxide,  
216 5% Ammonium Oxalate, and used decalcification solution from the specimen container.  
217 The decalcification process continued if the solution remained cloudy after 15 minutes.  
218 After decalcification, cochleae were washed three times for 10 minutes with PBS.  
219 Cochleae were then submersed in a cryoprotectant solution starting at 10% and  
220 increasing the cryoprotectant solution concentration by 10% every hour stopping at  
221 30%. Cryoprotected cochleae were stored at -20 C until ready for sectioning. Cochleae  
222 were then infused with O.C.T. embedding medium (Tissue-TEK) and mounted to  
223 microtome stage with O.T.C. and dry ice. Using the sliding block microtome (American  
224 Optical 860) each cochlea was then sectioned in the mid-modiolar plane at 30 microns.  
225 Sections were then placed on slides for immunostaining and imaging. CX3CR1<sup>+GFP</sup>  
226 mice demonstrated endogenously green fluorescent monocytes and macrophages and  
227 Thy1<sup>+YFP</sup> mice exhibited endogenously yellow fluorescent spiral ganglion neurons and

228 processes. When available, the YFP channel was included in histology pictures.  
229 Nuclear staining was performed with 1:1000 Hoechst (Hoechst 33342, Thermo  
230 Scientific).

#### 231 232 *2.4 Microscopy and macrophage quantification*

233 A Leica SP5 (Leica, Germany) inverted confocal microscope was used to acquire 20x  
234 images of three serial sections per cochlea that included full views of the implanted  
235 basal turn. Imaris software (Bitplane, Switzerland) was used to perform volumetric cell  
236 counting through an entire histologic section z-stack. Regions of interest (ROI) including  
237 the Scala Tympani (ST), Lateral Wall (LW), Rosenthal's Canal (RC) were defined by  
238 personnel familiar with cochlear microanatomy and blinded to experimental condition.  
239 Specifically, the LW region included both the spiral ligament and stria vascularis  
240 regions. The volume of the ROI as well as the overall number of all cell nuclei and GFP-  
241 positive cells were automatically quantified within the Imaris software and then manually  
242 verified by the examiner. These data were used to calculate the ratio of GFP-positive  
243 (macrophage) to total cell nuclei and density of GFP-positive cells (macrophages) in a  
244 defined ROI volume.

#### 245 246 *2.5 Statistical analysis*

247 Data were analyzed in GraphPad Prism 9 (Graphpad, USA). Graphs and histology  
248 images were made in Adobe Illustrator (Adobe, USA). Analysis of macrophage density  
249 and ratio were performed via a mixed effects model with group and time as independent  
250 variables, with follow-up multiple comparisons Tukey's test when significant effects were  
251 encountered. Statistical significance was defined as  $p < 0.05$ .

252  
253

### 254 **3 Results**

255

#### 256 *3.1 Electrode impedance increases with time*

257 **Figure 2** depicts impedance measurements overtime for separate electrodes at their  
258 pre-implantation, post-implantation and final timepoint measurements. Pre-implantation,  
259 conditioned electrode impedances ranged from 7.13-17.68 kOhms and post-  
260 implantation impedances ranged 9.13-23.85 kOhms (with one outlier at 37.22C kOhms  
261 that remained elevated above 35 kOhms on subsequent measurements). This study  
262 comprised 162 separate intracochlear electrodes in 54 cochlear implants. Most  
263 electrodes (147 or 90.7%) showed a gradual increase in impedance overtime, with a  
264 smaller portion of electrodes (15 or 9.3%) showing a sharp increase in impedance to the  
265 system testing limit of 125 kOhms, which denotes an open circuit and possible  
266 hardware failure (e.g. electrode lead wire fracture). These two distinct patterns of  
267 impedance creep are consistent with prior observations in this mouse CI model  
268 (Claussen et al., 2019). Within the experimental system, electrodes with impedances at  
269 or below 35 kOhms are considered functional; electrodes with impedances greater than  
270 35 kOhms are unable to be stimulated as they are considered to exceed safe limits  
271 defined by the Shannon Equation. **Table 1** tabulates the number of functional  
272 electrodes on each implant at each respective endpoint (n=3 per timepoint and  
273 condition). At the furthest timepoint, 21 days post-implantation, 6/9 (66.7%) implants

274 maintained at least 2 functional electrodes, enabling continued stimulation at this point.  
 275 This is improved from prior, reporting only 25% of implants maintaining 2 functional  
 276 electrode at 21 days post-implantation (Claussen et al., 2019). NRT thresholds were  
 277 recorded weekly and ranged from 90 – 150CL across the cohort of all functional  
 278 electrodes.  
 279  
 280

*Table 1. Final Electrode Functional Status*

| Number of functional ( $\leq 35$ kOhms) electrodes per implant (n=3 per timepoint) |         |       |        |        |        |         |         |         |
|------------------------------------------------------------------------------------|---------|-------|--------|--------|--------|---------|---------|---------|
|                                                                                    | 4 hours | 1 day | 4 days | 7 days | 8 days | 11 days | 14 days | 21 days |
| Chronic Insertion                                                                  | 3,3,3   | 3,3,3 | 3,3,3  | 3,3,3  | 0,3,3  | 1,3,3   | 1,1,3   | 2,2,3   |
| Low Stimulation                                                                    |         |       |        | 3,3,3  | 3,3,3  | 3,3,3   | 2,3,3   | 0,0,2   |
| High Stimulation                                                                   |         |       |        | 2,3,3  | 3,3,3  | 1,3,3   | 0,1,1   | 0,3,3   |

281  
 282 **Table 1.** Number of functional electrodes per CI at the final time-point for the respective  
 283 group and timepoint combinations. The number of functional electrodes per electrode at  
 284 the final timepoint for each CI is listed, separating individual subjects with a “,”. A  
 285 functional electrode was defined as having an impedance  $\leq 35$  kOhms.  
 286

### 3.2 Cochlear histologic changes following cochlear implantation

287 **Figure 3** depicts representative mid-modiolar sections across groups and timepoints. At  
 288 baseline in control subjects, a small population of cochlear CX3CR1+ cells was seen  
 289 throughout the cochlea, notably present within the modiolus, RC, LW and bone marrow  
 290 spaces within the otic capsule, but absent from the ST. The majority of CX3CR1+ cells  
 291 displayed a ramified morphology with dendritic processes. A varied increase in  
 292 CX3CR1+ cells was noted across all experimental groups throughout the cochlea,  
 293 prominently appearing in the LW, RC and modiolus and continuing to exhibit a majority  
 294 ramified morphology. This influx of CX3CR1+ cells was most robust in the chronically  
 295 implanted groups (ChI, LS and HS), peaking in the LW between days 7-21 and in RC  
 296 between days 8-14.  
 297  
 298

299 In response to chronic implantation (ChI, LS and HS groups), a robust cellular infiltrate,  
 300 including CX3CR1+ cells, was visible in the ST starting on post-operative day 4. As  
 301 seen in **Figure 3**, this tissue response formed around the CI electrode array and  
 302 sometimes completely filled the ST space. The morphology of CX3CR1+ cells within the  
 303 ST tissue response was more heterogeneous compared to the rest of the cochlea, often  
 304 including diffusely fluorescent amoeboid cells alongside the ramified cells (**Figure 4**).  
 305 The tissue response extended from the round window to the basal turn of the ST but  
 306 was not seen at areas estimated to be distal to the depth of CI insertion (middle and  
 307 apical turns). Notably, the AI group displayed a cellular infiltrate immediately adjacent to  
 308 the round window, mostly absent of CX3CR1+ cells, but this did not extend further into  
 309 the basal turn of the ST in any subjects (**Figure 5**). No similar tissue response was seen

310 at the round window in the sham or control groups. No obvious scalar translocations  
311 were seen amongst the AI, ChI, LS or HS groups.

312

### 313 3.3 Quantification of CX3CR1+ cellular infiltration

314

#### 315 3.3.1 Rosenthal's canal

316 **Figure 6** depicts quantification of CX3CR1+ cell density and ratio of CX<sub>3</sub>CR1+ cells to  
317 total cell nuclei in Rosenthal's Canal. CX3CR1+ cell infiltration was minimal among all  
318 groups until post-operative day 4, when both CX3CR1+ cell density and ratio raised in  
319 both the ChI and Sham groups. CX3CR1+ cell infiltration was generally seen to be  
320 elevated in the ChI, LS and HS groups compared to all other groups, reaching a peak  
321 from post-operative day 8 to 14 and falling slightly at post-operative day 21. The sham  
322 and AI groups showed peaks in CX3CR1+ cell quantification at post-operative day 4  
323 and 7, respectively, but maintained values close to controls at other time-points.  
324 CX3CR1+ cell density and ratio were significantly ( $p<0.05$ ) increased in the ChI and LS  
325 groups compared to controls from post-operative day 7-21. CX3CR1+ cell ratio was  
326 significantly increased ( $p<0.05$ ) in the ChI, LS and HS groups compared to controls and  
327 acute insertion from post-operative day 7-21. There was no significant difference  
328 amongst chronically implanted groups at any time-point. As previously mentioned, YFP  
329 neuronal labelling was not available in all subjects, thus we are unable to make  
330 comparisons among conditions regarding spiral ganglion neuron survival and response  
331 after cochlear implantation.

332

#### 333 3.3.2 Lateral wall

334 Quantification of CX3CR1+ cell density and ratio to total cell nuclei in the lateral wall  
335 region (including the stria vascularis and spiral ligament) is depicted in **Figure 7**.  
336 Elevated CX3CR1+ cell infiltration was seen in both the ChI and AI groups as early as 4  
337 hours post-implantation. The AI group maintained a steady plateau of increased  
338 CX3CR1+ cell density and cell number compared to controls across all time-points,  
339 whereas the ChI group showed continued increase in CX3CR1+ cell infiltration until  
340 reaching a steady state from day 7 to 21. Similarly, the CX3CR1+ cell density and ratio  
341 remained elevated in the LS and HS groups compared to controls from post-operative  
342 day 7 to 21, with a notable peak in LS on day 7. The ChI, LS and HS groups showed  
343 significantly ( $p<0.05$ ) greater CX3CR1+ cell density and ratio compared to controls, AI  
344 and sham across timepoints. There were no significant ( $p<0.05$ ) differences between  
345 ChI, LS and HS groups at any timepoint.

346

#### 347 3.3.3 Scala tympani

348 **Figure 8** depicts the quantification of CX3CR1+ cell density and ratio in the ST. A ST  
349 tissue response, including CX3CR1+ cell infiltration and increased cellularity, was seen  
350 as early as 4 days post-implantation in the ChI group, with all implanted subjects (ChI,  
351 LS and HS groups) showing an intrascalar cellular infiltration comprised of both  
352 CX3CR1+ cells and other GFP-negative cells by post-implantation day 7, which  
353 persisted until the final time-point at day 21. CX3CR1+ cell density and ratio in the 3  
354 implanted groups was significantly ( $p<0.05$ ) greater compared to control, AI and Sham  
355 from day 4 onward. There was no significant ( $p<0.05$ ) difference between the ChI, LS



356 and HS groups. CX3CR1<sup>+</sup> cell density remained persistently elevated in the implanted  
357 groups until the final timepoint at day 21, however CX3CR1<sup>+</sup> cell ratio showed a  
358 consistent decline amongst all 3 chronically implanted groups on day 21. This reduction  
359 in CX3CR1<sup>+</sup> cell ratio in the setting of a steady CX3CR1<sup>+</sup> cell density suggests an  
360 accumulation of other GFP-negative immune (e.g. leukocytes) or non-immune cells  
361 (e.g. fibroblasts) within the ST at this final time-point.

362

#### 363 **4 Discussion**

364

365 This study was designed to examine the cochlear innate immune response to cochlear  
366 implantation in CX3CR1<sup>+/GFP</sup> mice across multiple timepoints and assess the separate  
367 contributions of surgical trauma (control vs sham vs AI vs ChI), presence of the CI  
368 foreign body (AI vs ChI) and electric stimulation (ChI vs LS vs HS). Past work suggests  
369 cochlear CX3CR1<sup>+</sup> cells primarily represent a population of resident cochlear  
370 macrophages in both normal and injured cochleae, enabling assessment of the cochlear  
371 innate immune response in this study (Hirose et al., 2005). Although the number of  
372 animals per group was limited secondary to the high number of group and timepoint  
373 combinations, several consistent patterns of response were observed. As expected  
374 from prior studies, a baseline cohort of CX3CR1<sup>+</sup> cells was seen throughout the  
375 cochlea, notably absent from the acellular spaces of the scalae. Any surgical trauma,  
376 including round window opening (sham) and acute CI insertion (AI) caused an increase  
377 in CX3CR1<sup>+</sup> cells within the lateral wall and Rosenthal's canal compared to baseline  
378 control, which was more pronounced with chronic CI insertion (ChI, LS and HS).  
379 Surgical trauma alone was not sufficient to induce a ST tissue response beyond the  
380 round window; Chronic CI insertion was necessary for formation of a ST tissue  
381 response. Varying the degree of electric stimulation did not affect the innate immune  
382 response to cochlear implantation. Taken together, these observations suggest surgical  
383 trauma alone may induce a cochlear innate immune response, but the chronic presence  
384 of an indwelling electrode array further augments the cochlear inflammatory response  
385 and is necessary in formation of a ST tissue response. Although likely multifactorial, this  
386 observation points to a critical role that the foreign body response to cochlear implant  
387 biomaterials plays in the cochlear inflammation, fibrosis and neo-ossification following  
388 CI.

389

390 The robust peri-implant cellular infiltrate in the ST of the chronically implanted groups  
391 was similar in extent to that previously published in the mouse CI model, in which the  
392 ST was occupied with fibrotic tissue and areas of neo-ossification confined to the depth  
393 of CI insertion. (Claussen et al., 2019). CX3CR1<sup>+</sup> cells were seen to comprise a  
394 substantial element of the ST response between days 7 and 11, accounting for over  
395 50% of the cells within the ST of some subjects. Similar patterns of tissue response  
396 have been documented in implanted human temporal bones, accompanied by both  
397 innate (e.g. monocytes, macrophages) (Noonan et al., 2020; Okayasu et al., 2020) and  
398 adaptive immune cells (e.g. B-cells, T-cells) (Nadol et al., 2014). However, the human  
399 intrascalar tissue response is sometimes seen to extend further past the depth of CI  
400 insertion or into other scala, especially in the setting of scalar translocations (Kamakura  
401 & Nadol, 2016; Li et al., 2007). The current key findings of the tissue response being

402 exclusively present in the chronically implanted groups and confined to areas directly  
403 adjacent to the CI highlights the role of the electrode array itself in driving and  
404 organizing the tissue response. Evidence of such a foreign body response has been  
405 seen in humans in the form of phagocytosed implant materials and foreign body giant  
406 cells (Nadol et al., 2008; O'Malley et al., 2017) and was recently reviewed by Foggia et  
407 al. (Foggia et al., 2019). In this special issue, Jensen et al., present new data comparing  
408 the foreign body response to different CI materials (e.g. silastic and platinum).  
409

410 It is not understood what effect, if any, electric stimulation may have on the cochlear  
411 immune response and fibrosis after cochlear implantation and if it would be mediated by  
412 electrode material composition or direct electric effect on surrounding tissues. Different  
413 patterns of tissue fibrosis surrounding the CI relating to the location of the platinum  
414 electrodes have been seen in human temporal bones (Ishai et al., 2017). Further,  
415 platinum dissolution into the scala has been demonstrated in guinea pig models of CI at  
416 charge densities above those used in the clinical setting, with the potential consequence  
417 of enhancing the foreign body response (Shepherd et al., 2019). We did not find any  
418 effect of the levels of electric stimulation used in this study on the innate immune  
419 response or degree of ST cellular infiltrate. Although overall rates of hardware failure  
420 (e.g. electrode impedance increasing to a level prohibiting electric stimulation) improved  
421 in this study prior to that published in Claussen et al. (2019), impedance creep and  
422 electrode failure did occur, hampering electric stimulation at the longest time points in  
423 the LS group, in particular. Notably, the charge densities used in this study were  
424 approximately 2 orders of magnitude below those shown to result in local platinum  
425 dissolution from the CI electrodes. Further, the robust and rapid development of a ST  
426 cellular infiltrate in the mouse CI model may obscure any small effects resulting from  
427 varied electric stimulation intensities, such as distribution of soft tissue fibrosis versus  
428 neo-ossification, which were not detectable with the histologic methods used in this  
429 study. We refer readers to Jensen et al. in this issue, where 3D X-ray microscopy was  
430 used to demonstrate a greater propensity for neo-ossification around platinum surfaces  
431 of the CI as opposed to silicone surfaces in a mouse CI model.  
432

433 In the current study, we cannot completely separate the role of insertion trauma from  
434 the foreign body effects of an indwelling CI toward eliciting a cochlear innate immune  
435 response, as the potential for insertion trauma is inherent to chronic cochlear  
436 implantation. However, round window opening and acute CI insertion alone, in the  
437 absence of obvious scalar translocations, was not sufficient to generate a tissue  
438 response beyond the immediate round window, but did elicit a cochlear innate immune  
439 response, albeit to a lesser degree, to chronic implantation. Other factors shown to  
440 promote cochlear fibrosis include surgical trauma from cochleostomy, use of muscle to  
441 seal round window and perilymphatic introduction of bone dust (McELVEEN et al.,  
442 1995; Rowe et al., 2016). However, these factors may not have influenced this study, as  
443 a round window approach was used that involved minimal drilling of the round window  
444 niche with irrigation of any bone dust prior to round window opening and use of fascia,  
445 not muscle to seal the round window. A cellular infiltrate mostly devoid of CX3CR1+  
446 cells was seen immediately at the round window in the acute insertion group, which may  
447 relate to the local irritation from round window niche drilling or the placement of a fascia

448 graft to seal the round window. There is ample evidence to suggest that major  
449 insertional trauma events, including scalar translocation and osseous spiral lamina  
450 fracture, may influence fibrosis and neo-ossification after cochlear implantation,  
451 however none of these events were seen in the present study to validate these  
452 causative factors (Kamakura & Nadol, 2016; Li et al., 2007; O'Leary et al., 2013).  
453 Based on these present and past findings, we observe that the CI insertion event  
454 generates an innate immune response and speculate that the immune cells and  
455 accompanying milieu of inflammatory mediators (e.g. chemokines, cytokines, growth  
456 factors) help initiate the foreign body response and fibrotic tissue reaction to the CI in an  
457 exposure dependent manner that is commensurate with the degree of insertional  
458 trauma. Understanding the mechanisms of how insertion trauma elicits an innate  
459 immune response is beyond the scope this study, but we hypothesize this broadly  
460 includes initiation of sterile inflammation through direct (e.g. physical cellular insult from  
461 force of insertion) and collateral (e.g. altered homeostasis and cell death related to  
462 trauma) generation of damage-associated molecular patterns and other inflammatory  
463 signals, the degree to which may vary with the severity of insertion trauma. (Klegeris,  
464 2021; Mariani et al., 2019; Wood & Zuo, 2017).

465  
466 In the normal mouse cochlea, CX3CR1+ cells mostly represent resident cochlear  
467 macrophages along with a smaller subset of other immune cells (e.g. NK cells, T cells)  
468 (Hirose et al., 2005). The increase in CX3CR1+ cells in the current study, especially in  
469 the chronic insertion groups, is similar to that following other cochlear injuries, including  
470 noise exposure and isolated outer hair cell ablation, and is seen to consistently peak 14  
471 days post-injury across several studies (Kaur et al., 2015; Rai et al., 2020; Tan et al.,  
472 2016). The nature of this increase in cochlear CX3CR1+ cells is likely due to migration  
473 of cochlear macrophages from the circulation, based on prior studies examining local  
474 proliferation of CX3CR1+ cells in the cochlea after noise (Hirose et al., 2005). An  
475 increase in circulating monocytes and tissue macrophages that exhibit low or no  
476 expression of CX3CR1+ also occurs following cochlear, neural and other tissue injury,  
477 however, the current study was not designed to detect these additional elements of the  
478 innate immune response (Hirose et al., 2014; Puntambekar et al., 2018; Wynn &  
479 Vannella, 2016). As evidence of a continued evolution of the inflammatory response, we  
480 saw a decrease in the ratio of macrophages to total number of cells within the ST in the  
481 chronically implanted groups from day 8 to 21 in the setting of a relatively stable trend of  
482 CX3CR1+ cell density. This finding may provide indirect evidence of evolving  
483 macrophage phenotype away from CX3CR1 + cells and an increase in other cells  
484 involved in fibrosis (e.g. myofibroblasts) that would contribute to maturation of the  
485 inflammatory response. The nature of cochlear implantation involving a chronic insult in  
486 the form of the CI foreign body may produce diverging temporal courses and  
487 phenotypes of the immune response compared to the other studies mentioned, which  
488 involve acute, single event injuries. The current study is limited by the absence of  
489 hearing loss prior to cochlear implantation and any associated alterations to or priming  
490 of the baseline resident macrophage population. Future work is needed to more  
491 broadly examine the evolving macrophage phenotypes not captured in the CX3CR1<sup>+GFP</sup>  
492 mouse CI model and to include prior deafening to more closely model the cochlear  
493 immune state prior to implantation as seen in the clinical context.

494  
495 CX3CR1+ macrophages play diverse roles including local surveillance for pathogens,  
496 debris clearance of damaged cells, and antigen presentation. Macrophage morphology  
497 is often associated with function, with ramified cells playing a surveillance role and  
498 amoeboid cells representing an activated, phagocytic phenotype (Savage et al., 2019).  
499 In the present study, a diversity of amoeboid and ramified morphologies of CX3CR1+  
500 cells were seen, which is consistent with findings in implanted human cadaveric studies  
501 (Noonan et al., 2020).

502 Macrophage phenotype or “polarization” has further been characterized along a  
503 spectrum of M1 (inflammatory) and M2 (anti-inflammatory) subtypes. Recent  
504 transcriptomic and flow cytometry data report additional complexity in distinguishing  
505 subtypes and their contributions to inflammation, fibrosis, tissue repair and regeneration  
506 (Parakalan et al., 2012; Rai et al., 2020; Wynn & Vannella, 2016). Within the cochlea,  
507 CX3CR1+ macrophages have been implicated in protective and homeostatic functions  
508 for spiral ganglion neurons following hair cell or direct neuronal injury (Kaur et al., 2015;  
509 Lang et al., 2016). Conversely, in other tissues, CX3CR1+ macrophages have shown  
510 an inflammatory and pro-fibrotic phenotype, particularly in the setting of pulmonary  
511 fibrosis (Aran et al., 2019; Wynn & Vannella, 2016). This pro-fibrotic subtype may be  
512 relevant to the present CI model, as the most robust increase in CX3CR1+ cells was  
513 seen in the fibrous tissue growth around the CI. However, the current data cannot  
514 definitively attribute any pro-fibrotic or other specific role CX3CR1+ macrophages in the  
515 cochlea.

516  
517 These experiments highlight the utility of a mouse model of functional CI, which can be  
518 combined with pre-existing transgenic mouse models to investigate both the cochlear  
519 immune response to CI (as in this study) and potentially extend to investigating CI in  
520 other models of hearing loss. The applications CX3CR1<sup>+GFP</sup> mice in a CI model extends  
521 beyond direct observation of the cochlear innate immune response and may be useful  
522 for studying the efficacy and mechanism of future strategies directed at mitigating the  
523 post-implantation fibrotic response and preserving residual acoustic hearing in hybrid  
524 cochlear implantation. Limitations of the mouse CI model include CI lead wire fracture  
525 and hardware failure that limit long-term stimulation. However, the current experiments  
526 show improvement in rates of electrode preservation compared to prior work. The rapid  
527 time-course (7-8 days) of peri-implant ST tissue response in implanted mice may not  
528 accurately model the similar time-course seen in humans, but does result in a similar  
529 macrophage infiltrate and areas of fibrotic soft tissue and neo-ossification (Noonan et  
530 al., 2020; Seyyedi & Nadol, 2014).

## 531 532 **5 Conclusion**

533  
534 Chronic CI placement in CX3CR1<sup>+GFP</sup> mice results in a robust innate immune response  
535 shown by an increase in CX3CR1 cells throughout the cochlea, accompanied by a peri-  
536 implant ST cellular infiltrate similar to that seen in humans. This tissue response is not  
537 significantly affected by the level of electric stimulation. Surgical trauma related to  
538 cochlear implantation alone initiated an innate immune response in the lateral wall and  
539 Rosenthal’s canal that was blunted compared to the response in chronically implanted

540 cochleae. Further, surgical trauma alone did not lead to significant cellular infiltration  
541 into the ST. This suggests that the foreign body reaction to a chronically implanted  
542 device is more important than the contribution of surgical trauma in the formation of  
543 cochlear fibrosis and remodeling of the cochlear architecture. Future work is needed to  
544 understand the role CX3CR1+ macrophages in the cochlear response to cochlear  
545 implantation as well as further elucidate the broader innate and adaptive immune  
546 response over time. Such insights may be useful in developing and measuring the  
547 efficacy of strategies to reduce the cochlear tissue response and loss of residual  
548 acoustic hearing after cochlear implantation.

549

## 550 6 Acknowledgements

551

552 Support for these studies was provided by National Institutes of Health, National  
553 Institute on Deafness and Other Communication Disorders, Bethesda MD [grant  
554 numbers R01 DC012578 (MRH), R01 DC011315 (KH), T32 DC000040 (ADC, MRH),  
555 and UL1TR002537 (MRH)], and Cochlear Americas, Centennial, CO [grant number  
556 17881800-01].

557

## 558 Figure Legends

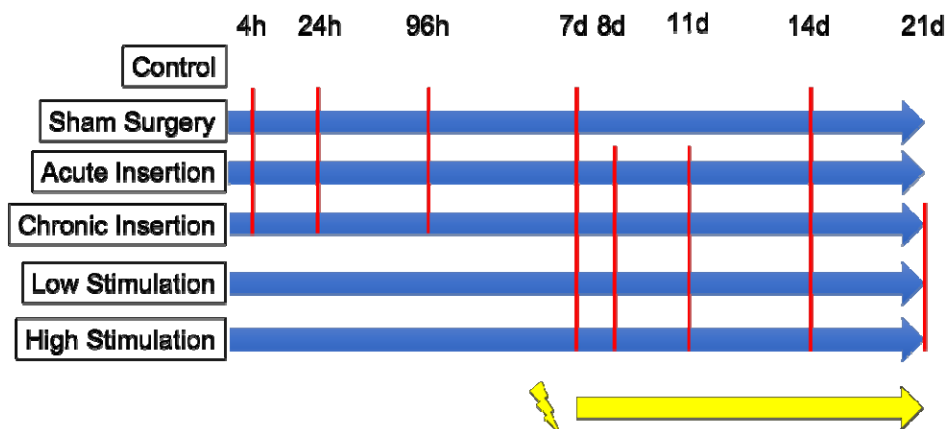

559

560 **Figure 1.** Experimental timeline. Timepoints are in reference to post-surgical time. Red  
561 lines mark separate timepoints included in respective groups. Electric stimulation in the  
562 relevant groups started on day 7, denoted by the yellow line.

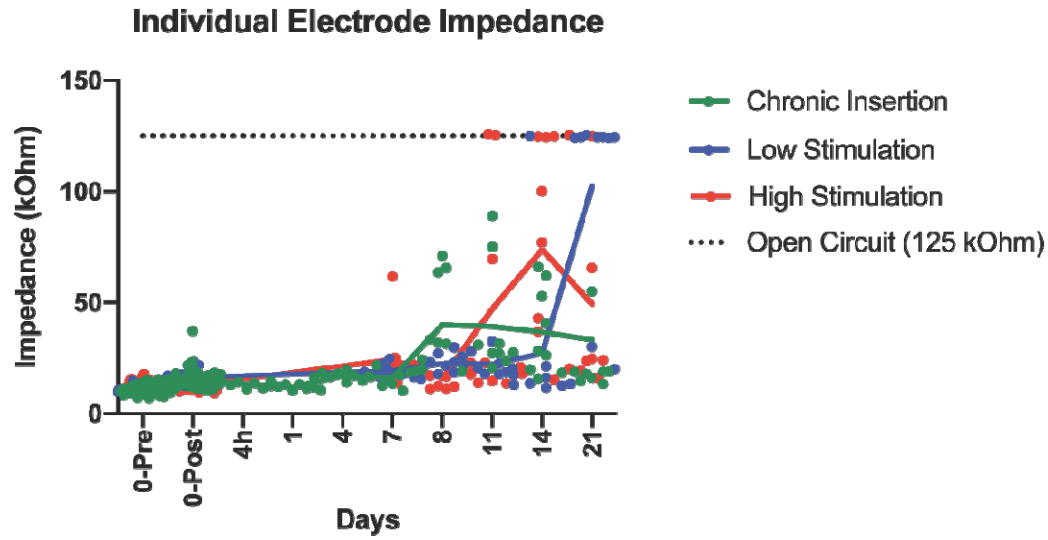

563  
564  
565  
566  
567

**Figure 2.** Baseline and final individual electrode impedance. The individual electrode impedance for the 3 intracochlear electrodes (E1,E2,E3) is plotted, including the initial values immediately before (0-Pre) and after (0-Post) implantation and final timepoint. The 125 kOhm value for an open circuit is plot as a dotted black line for reference.

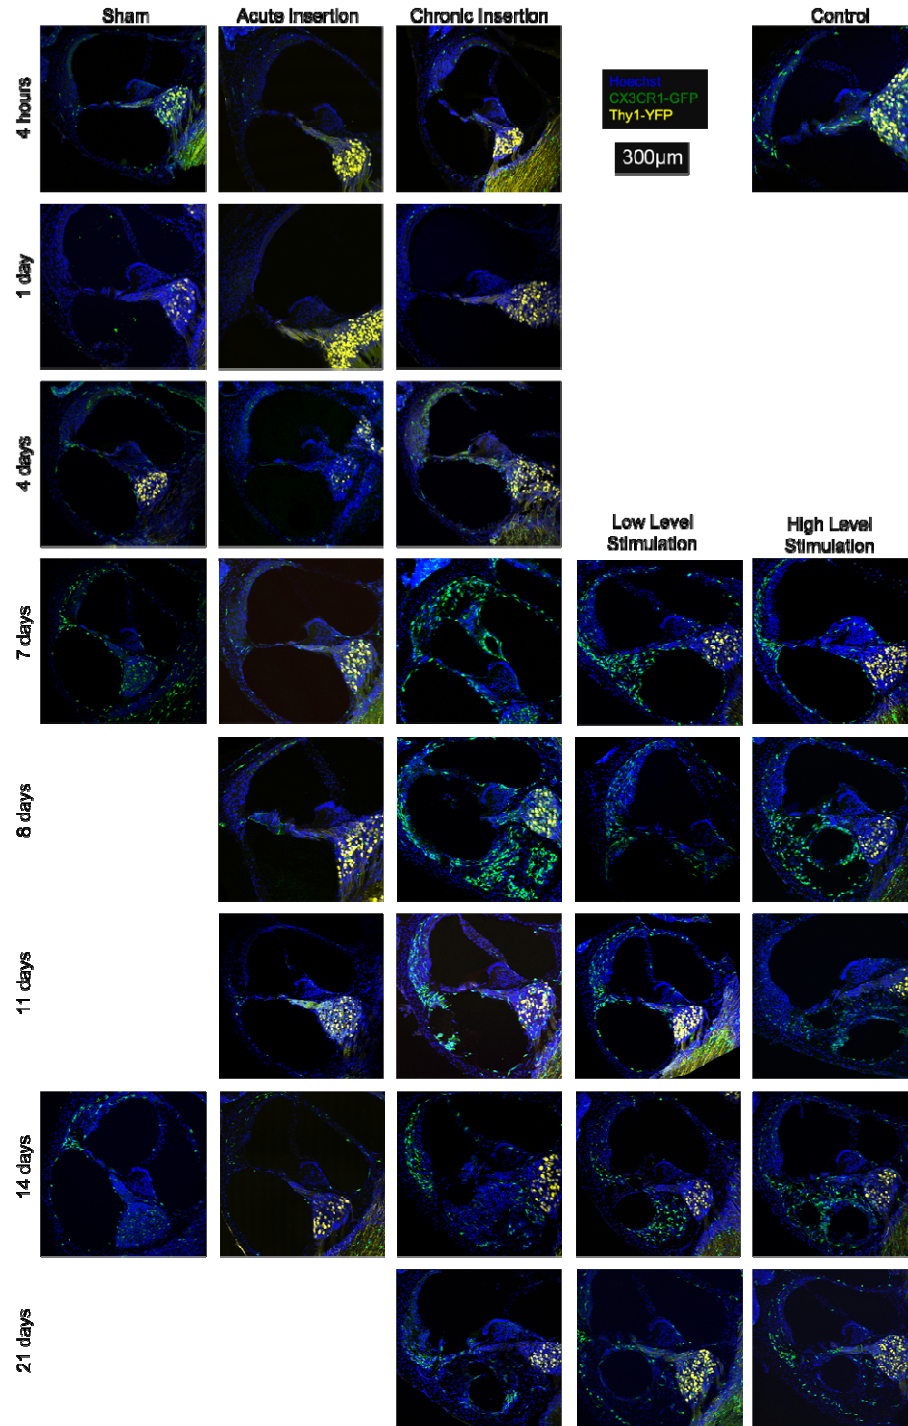

568  
569  
570  
571  
572  
573  
574

**Figure 3.** Cochlear fluorescence microscopy after chronic implantation. Mid-modiolar sections of the basal turn of the left cochlea from respective groups. Macrophage infiltration of the cochlea appears to increase over time and in the presence of the cochlear implant. Cellular infiltration into the ST was seen 7 days after implantation, accompanied by macrophage infiltration. Images show nuclei (Hoechst, blue), macrophages (CX3CR1-GFP, green) and neurons, (Thy1-YFP, yellow).

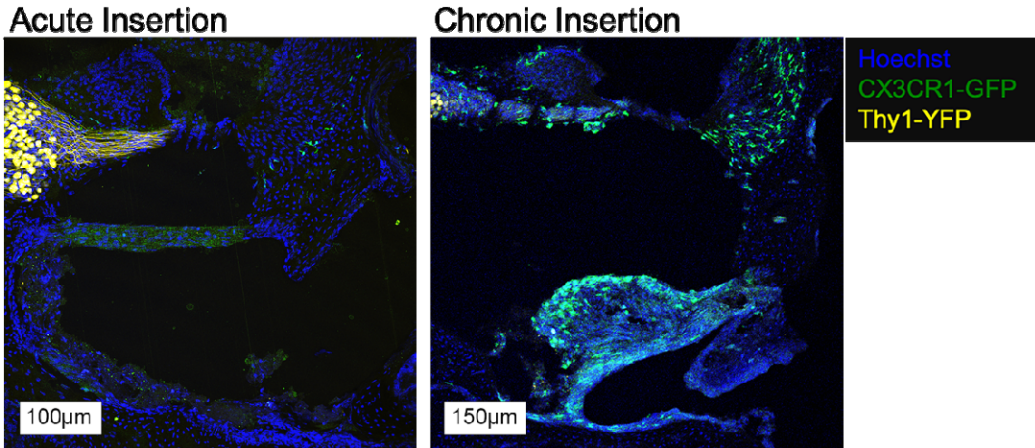

575  
576 **Figure 4.** Round window membrane in AI and ChI mice at day 7. A small tissue  
577 response confined to the round window, without an implant tract is seen in the AI group  
578 with a small number of CX3CR1+ cells. A similar tissue response near the round  
579 window with an implant tract is seen in the ChI group, accompanied by a more robust  
580 monocyte/macrophage infiltrate. Images show cell nuclei (Hoechst, blue), macrophages  
581 (CX3CR1-GFP, green) and neurons, (Thy1-YFP, yellow).

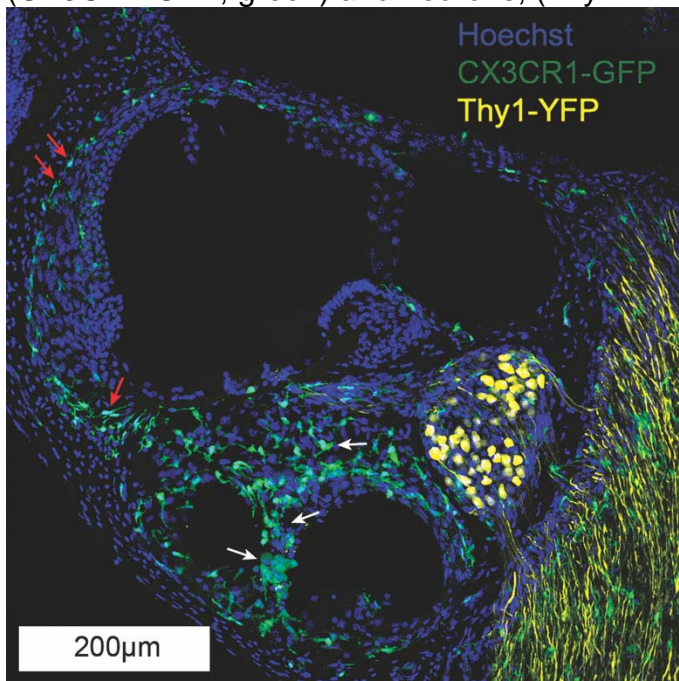

582  
583 **Figure 5.** Basal turn, 14 day High Stimulation. Red arrows highlight the ramified  
584 macrophages and white arrows the ameboid macrophages, located in fibrotic tissue of  
585 the scala tympani. Labeling includes nuclei (Hoechst, blue), macrophages (CX3CR1-  
586 GFP, green) and neurons, (Thy1-YFP, yellow).



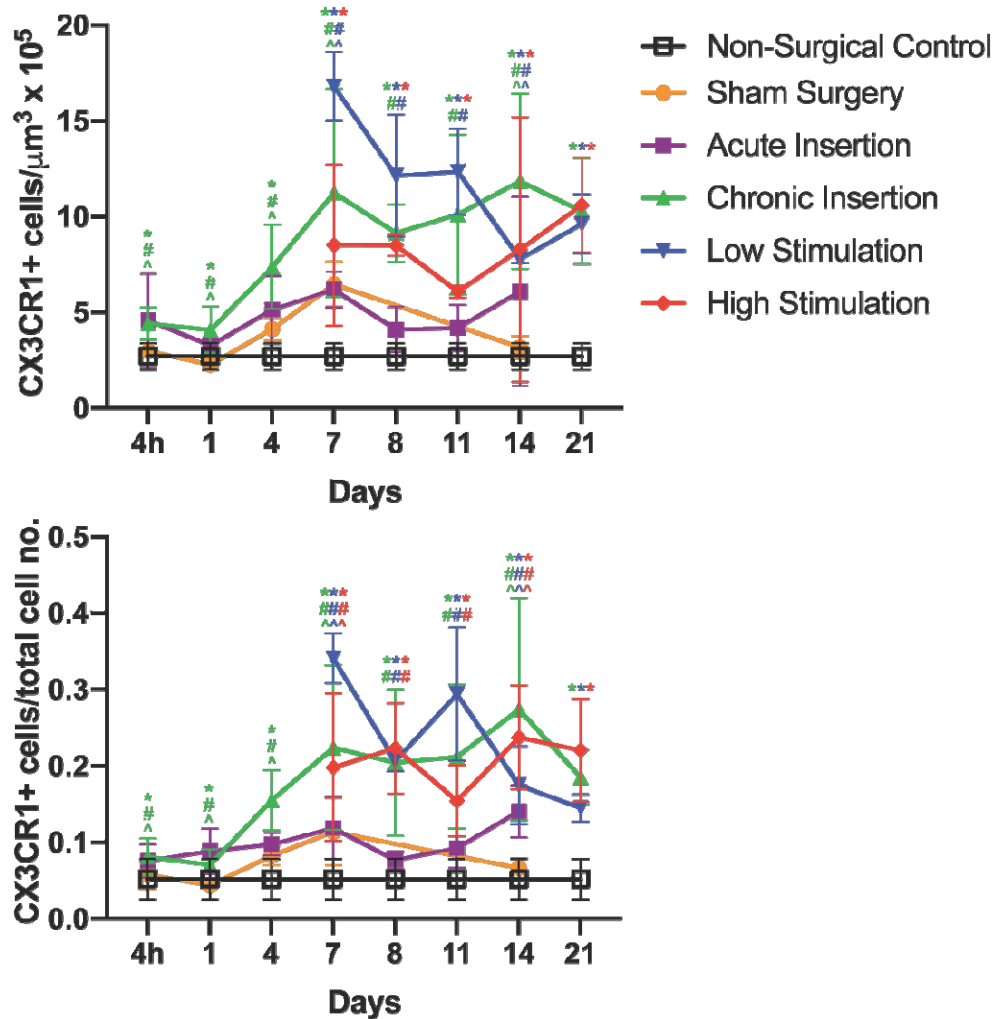

587  
588 **Figure 6.** CX3CR1+ cell density and ratio in the lateral wall. Density was calculated as  
589 quantity of CX3CR1+ cells per unit volume. Ratio was calculated as quantity of  
590 CX3CR1+ cell per total number of cells. “\*”, “#” and “^” are color coded to respective  
591 groups to denote statistically significant differences ( $p < 0.05$ ) compared to the control, AI  
592 and sham surgery groups, respectively. Error bars represent standard deviation.

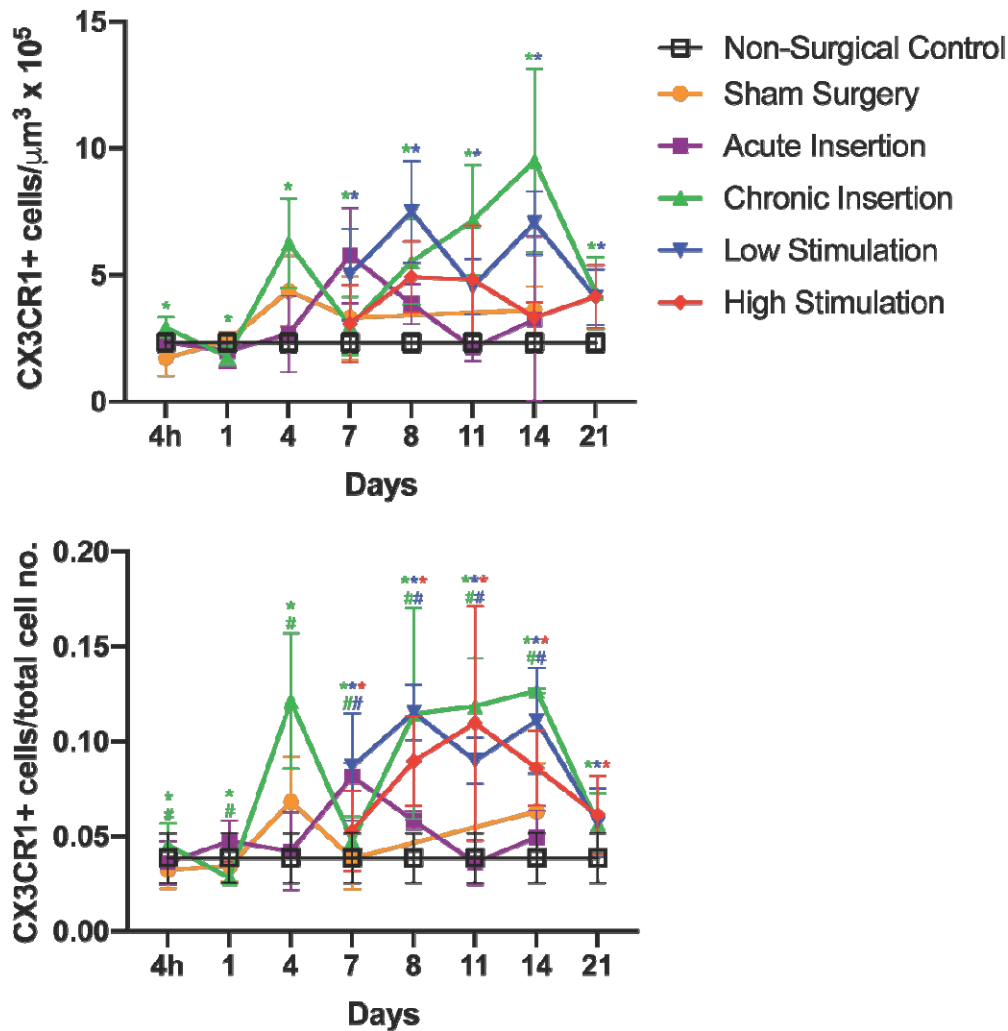

593  
594 **Figure 7.** CX3CR1+ cell density and ratio in Rosenthal's Canal. Density was calculated  
595 as quantity of CX3CR1+ cells per unit volume. Ratio was calculated as quantity of  
596 CX3CR1+ positive cell per total number of cells. "\*" and "#" are color coded to  
597 respective groups to denote statistically significant differences (p<0.05) compared to the  
598 control and AI and groups, respectively. Error bars represent standard deviation.

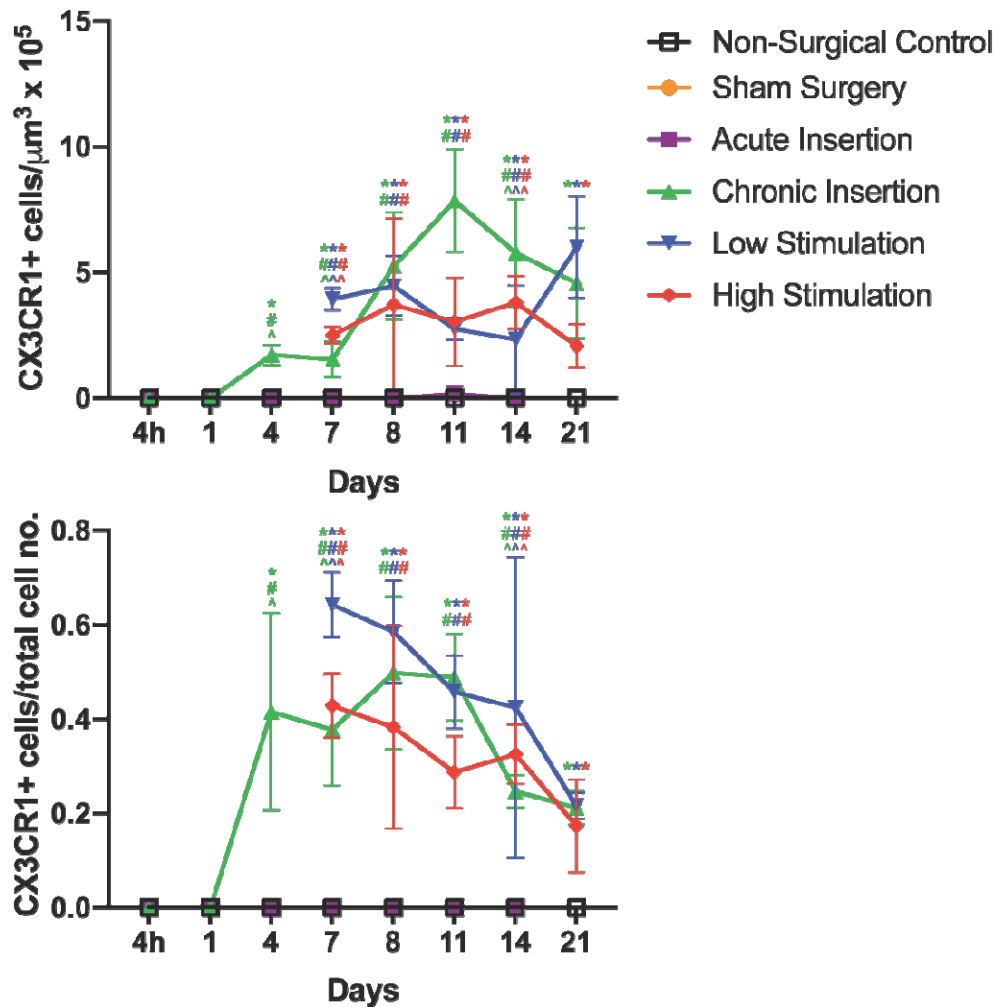

599  
 600 **Figure 8.** CX3CR1+ cell density and ratio in the Scala Tympani. Density was calculated  
 601 as quantity of CX3CR1+ cells per unit volume. Ratio was calculated as quantity of  
 602 CX3CR1+ cells per total number of cells. “\*”, “#” and “^” are color coded to respective  
 603 groups to denote statistically significant differences ( $p < 0.05$ ) compared to the control, AI  
 604 and sham surgery groups, respectively. Error bars represent standard deviation.

605  
 606 **References**

607  
 608 Aran, D., Looney, A. P., Liu, L., Wu, E., Fong, V., Hsu, A., Chak, S., Naikawadi, R. P.,  
 609 Wolters, P. J., Abate, A. R., Butte, A. J., & Bhattacharya, M. (2019). Reference-  
 610 based analysis of lung single-cell sequencing reveals a transitional profibrotic  
 611 macrophage. *Nature Immunology*, 20(2), 163–172. <https://doi.org/10.1038/s41590-018-0276-y>  
 612  
 613 Clark, G. M., Kranz, H. G., Minas, H., & Nathar, J. M. (1975). Histopathological findings  
 614 in cochlear implants in cats. *The Journal of Laryngology & Otology*, 89(5), 495–504.

- 615 <https://doi.org/10.1017/S002221510008066X>
- 616 Claussen, A. D., Quevedo, R. V., Mostaert, B., Kirk, J. R., Dueck, W. F., & Hansen, M.  
617 R. (2019). A mouse model of cochlear implantation with chronic electric stimulation.  
618 *PLoS ONE*, 14(4). <https://doi.org/10.1371/journal.pone.0215407>
- 619 Feng, G., Mellor, R. H., Bernstein, M., Keller-Peck, C., Nguyen, Q. T., Wallace, M.,  
620 Nerbonne, J. M., Lichtman, J. W., & Sanes, J. R. (2000). Imaging neuronal subsets  
621 in transgenic mice expressing multiple spectral variants of GFP. *Neuron*, 28(1), 41–  
622 51. [https://doi.org/10.1016/S0896-6273\(00\)00084-2](https://doi.org/10.1016/S0896-6273(00)00084-2)
- 623 Foggia, M. J., Quevedo, R. V., & Hansen, M. R. (2019). Intracochlear fibrosis and the  
624 foreign body response to cochlear implant biomaterials. *Laryngoscope Investigative*  
625 *Otolaryngology*. <https://doi.org/10.1002/lio2.329>
- 626 Goman, A. M., Dunn, C. C., Gantz, B. J., & Lin, F. R. (2018). PREVALENCE of  
627 POTENTIAL HYBRID and CONVENTIONAL COCHLEAR IMPLANT CANDIDATES  
628 BASED on AUDIOMETRIC PROFILE. In *Otology and Neurotology*.  
629 <https://doi.org/10.1097/MAO.0000000000001728>
- 630 Hirose, K., Discolo, C. M., Keasler, J. R., & Ransohoff, R. (2005). Mononuclear  
631 phagocytes migrate into the murine cochlea after acoustic trauma. *Journal of*  
632 *Comparative Neurology*, 489(2), 180–194. <https://doi.org/10.1002/cne.20619>
- 633 Hirose, K., Li, S. Z., Ohlemiller, K. K., & Ransohoff, R. M. (2014). Systemic  
634 lipopolysaccharide induces cochlear inflammation and exacerbates the synergistic  
635 ototoxicity of kanamycin and furosemide. *JARO - Journal of the Association for*  
636 *Research in Otolaryngology*, 15(4), 555–570. [https://doi.org/10.1007/s10162-014-](https://doi.org/10.1007/s10162-014-0458-8)  
637 0458-8
- 638 Ishai, R., Herrmann, B. S., Nadol, J. B., & Quesnel, A. M. (2017). The pattern and  
639 degree of capsular fibrous sheaths surrounding cochlear electrode arrays. *Hearing*  
640 *Research*, 348, 44–53. <https://doi.org/10.1016/j.heares.2017.02.012>
- 641 Jung, S., Aliberti, J., Graemmel, P., Sunshine, M. J., Kreutzberg, G. W., Sher, A., &  
642 Littman, D. R. (2000). Analysis of Fractalkine Receptor CX3CR1 Function by  
643 Targeted Deletion and Green Fluorescent Protein Reporter Gene Insertion.  
644 *Molecular and Cellular Biology*, 20(11), 4106–4114.  
645 <https://doi.org/10.1128/mcb.20.11.4106-4114.2000>
- 646 Kamakura, T., & Nadol, J. B. (2016). Correlation between word recognition score and  
647 intracochlear new bone and fibrous tissue after cochlear implantation in the human.  
648 *Hearing Research*, 339, 132–141. <https://doi.org/10.1016/j.heares.2016.06.015>
- 649 Kaufmann, C. R., Tejani, V. D., Fredericks, D. C., Henslee, A. M., Sun, D. Q., Abbas, P.  
650 J., & Hansen, M. R. (2020). Pilot Evaluation of Sheep as in Vivo Model for Cochlear  
651 Implantation. *Otology and Neurotology*.  
652 <https://doi.org/10.1097/MAO.0000000000002587>
- 653 Kaur, T., Zamani, D., Tong, L., Rube, E. W., Ohlemiller, K. K., Hirose, K., & Warchol, M.  
654 E. (2015). Fractalkine signaling regulates macrophage recruitment into the cochlea  
655 and promotes the survival of spiral ganglion neurons after selective hair cell lesion.  
656 *Journal of Neuroscience*, 35(45), 15050–15061.  
657 <https://doi.org/10.1523/JNEUROSCI.2325-15.2015>
- 658 Klegeris, A. (2021). *Regulation of neuroimmune processes by damage- and resolution-*  
659 *associated molecular patterns*. 16(3), 423–429.
- 660 Lang, H., Nishimoto, E., Xing, Y., Brown, L. S. N., Noble, K. V., Barth, J. L., LaRue, A.

- 661 C., Ando, K., & Schulte, B. A. (2016). Contributions of mouse and human  
662 hematopoietic cells to remodeling of the adult auditory nerve after neuron loss.  
663 *Molecular Therapy*, 24(11), 2000–2011. <https://doi.org/10.1038/mt.2016.174>
- 664 Li, P. M. M. C., Somdas, M. A., Eddington, D. K., & Nadol, J. B. (2007). Analysis of  
665 intracochlear new bone and fibrous tissue formation in human subjects with  
666 cochlear implants. *Annals of Otolaryngology, Rhinology and Laryngology*, 116(10), 731–  
667 738. <https://doi.org/10.1177/000348940711601004>
- 668 Linthicum, F. H., Doherty, J. K., Lopez, I. A., & Ishiyama, A. (2017). Cochlear implant  
669 histopathology. *World Journal of Otorhinolaryngology - Head and Neck Surgery*,  
670 3(4), 211–213. <https://doi.org/10.1016/j.wjorl.2017.12.008>
- 671 Mariani, E., Lisignoli, G., Borzì, R. M., & Pulsatelli, L. (2019). Biomaterials: Foreign  
672 bodies or tuners for the immune response? *International Journal of Molecular*  
673 *Sciences*, 20(3). <https://doi.org/10.3390/ijms20030636>
- 674 McELVEEN, J. T., WOLFORD, R. D., & MIYAMOTO, R. T. (1995). Implications of bone  
675 pâté in cochlear implant surgery. *Otolaryngology - Head and Neck Surgery*.  
676 [https://doi.org/10.1016/S0194-5998\(95\)70284-9](https://doi.org/10.1016/S0194-5998(95)70284-9)
- 677 Mitchell-Innes, A., Saeed, S. R., & Irving, R. (2018). The future of cochlear implant  
678 design. *Advances in Oto-Rhino-Laryngology*, 81, 105–113.  
679 <https://doi.org/10.1159/000485540>
- 680 Nadol, J. B., Eddington, D. K., & Burgess, B. J. (2008). Foreign Body or Hypersensitivity  
681 Granuloma of the Inner Ear After Cochlear Implantation: One Possible Cause of a  
682 Soft Failure? *Otology and Neurotology*, 29(8), 1076–1084.  
683 <https://doi.org/10.1097/MAO.0b013e31818c33cf>
- 684 Nadol, J. B., O'Malley, J. T., Burgess, B. J., & Galler, D. (2014). Cellular immunologic  
685 responses to cochlear implantation in the human. *Hearing Research*, 318, 11–17.  
686 <https://doi.org/10.1016/j.heares.2014.09.007>
- 687 Needham, K., Stathopoulos, D., Newbold, C., Leavens, J., Risi, F., Manouchehri, S.,  
688 Durmo, I., & Cowan, R. (2020). Electrode impedance changes after implantation of  
689 a dexamethasone-eluting intracochlear array. *Cochlear Implants International*,  
690 21(2), 98–109. <https://doi.org/10.1080/14670100.2019.1680167>
- 691 Noonan, K. Y., Lopez, I. A., Ishiyama, G., & Ishiyama, A. (2020). Immune Response of  
692 Macrophage Population to Cochlear Implantation: Cochlea Immune Cells. *Otology*  
693 *& Neurotology* □: Official Publication of the American Otological Society, American  
694 Neurotology Society [and] European Academy of Otology and Neurotology.  
695 <https://doi.org/10.1097/MAO.0000000000002764>
- 696 O'Leary, S. J., Monksfield, P., Kel, G., Connolly, T., Souter, M. A., Chang, A., Marovic,  
697 P., O'Leary, J. S., Richardson, R., & Eastwood, H. (2013). Relations between  
698 cochlear histopathology and hearing loss in experimental cochlear implantation.  
699 *Hearing Research*, 298, 27–35. <https://doi.org/10.1016/j.heares.2013.01.012>
- 700 O'Malley, J. T., Burgess, B. J., Galler, D., & Nadol, J. B. (2017). Foreign body response  
701 to silicone in cochlear implant electrodes in the human. *Otology and Neurotology*,  
702 38(7), 970–977. <https://doi.org/10.1097/MAO.0000000000001454>
- 703 Okayasu, T., O'Malley, J. T., & Nadol, J. B. (2019). Density of macrophages  
704 immunostained with anti-iba1 antibody in the vestibular endorgans after cochlear  
705 implantation in the human. *Otology and Neurotology*, 40(8), E774–E781.  
706 <https://doi.org/10.1097/MAO.0000000000002313>

- 707 Okayasu, T., Quesnel, A. M., O'Malley, J. T., Kamakura, T., & Nadol, J. B. (2020). The  
708 Distribution and Prevalence of Macrophages in the Cochlea Following Cochlear  
709 Implantation in the Human: An Immunohistochemical Study Using Anti-Iba1  
710 Antibody. *Otology and Neurotology*, *41*(3), e304–e316.  
711 <https://doi.org/10.1097/MAO.0000000000002495>
- 712 Parakalan, R., Jiang, B., Nimmi, B., Janani, M., Jayapal, M., Lu, J., Tay, S. S. W., Ling,  
713 E. A., & Dheen, S. T. (2012). Transcriptome analysis of amoeboid and ramified  
714 microglia isolated from the corpus callosum of rat brain. *BMC Neuroscience*, *13*(1).  
715 <https://doi.org/10.1186/1471-2202-13-64>
- 716 Puntambekar, S. S., Saber, M., Lamb, B. T., & Kokiko-Cochran, O. N. (2018). Cellular  
717 players that shape evolving pathology and neurodegeneration following traumatic  
718 brain injury. In *Brain, Behavior, and Immunity* (Vol. 71, pp. 9–17). Academic Press  
719 Inc. <https://doi.org/10.1016/j.bbi.2018.03.033>
- 720 Quesnel, A. M., Nakajima, H. H., Rosowski, J. J., Hansen, M. R., Gantz, B. J., & Nadol,  
721 J. B. (2016). Delayed loss of hearing after hearing preservation cochlear  
722 implantation: Human temporal bone pathology and implications for etiology.  
723 *Hearing Research*, *333*, 225–234. <https://doi.org/10.1016/j.heares.2015.08.018>
- 724 Rai, V., Wood, M. B., Feng, H., Schabla, N. M., Tu, S., & Zuo, J. (2020). The immune  
725 response after noise damage in the cochlea is characterized by a heterogeneous  
726 mix of adaptive and innate immune cells. *Scientific Reports*, *10*(1), 1–17.  
727 <https://doi.org/10.1038/s41598-020-72181-6>
- 728 Roche, J. P., & Hansen, M. R. (2015). On the Horizon: Cochlear Implant Technology.  
729 *Otolaryngologic Clinics of North America*, *48*(6), 1097–1116.  
730 <https://doi.org/10.1016/j.otc.2015.07.009>
- 731 Rowe, D., Chambers, S., Hampson, A., Eastwood, H., Campbell, L., & O'Leary, S.  
732 (2016). Delayed low frequency hearing loss caused by cochlear implantation  
733 interventions via the round window but not cochleostomy. *Hearing Research*, *333*,  
734 49–57. <https://doi.org/10.1016/j.heares.2015.12.012>
- 735 Sato, E., Shick, H. E., Ransohoff, R. M., & Hirose, K. (2008). Repopulation of cochlear  
736 macrophages in murine hematopoietic progenitor cell chimeras: The role of  
737 CX3CR1. *Journal of Comparative Neurology*, *506*(6), 930–942.  
738 <https://doi.org/10.1002/cne.21583>
- 739 Sato, E., Shick, H. E., Ransohoff, R. M., & Hirose, K. (2010). Expression of fractalkine  
740 receptor CX3CR1 on cochlear macrophages influences survival of hair cells  
741 following ototoxic injury. *JARO - Journal of the Association for Research in*  
742 *Otolaryngology*, *11*(2), 223–234. <https://doi.org/10.1007/s10162-009-0198-3>
- 743 Savage, J. C., Carrier, M., & Tremblay, M. É. (2019). Morphology of Microglia Across  
744 Contexts of Health and Disease. In *Methods in Molecular Biology* (Vol. 2034, pp.  
745 13–26). Humana Press Inc. [https://doi.org/10.1007/978-1-4939-9658-2\\_2](https://doi.org/10.1007/978-1-4939-9658-2_2)
- 746 Schepelerle, R. A., Tejani, V. D., Omtvedt, J. K., Brown, C. J., Abbas, P. J., Hansen, M.  
747 R., Gantz, B. J., Oleson, J. J., & Ozanne, M. V. (2017). Delayed changes in  
748 auditory status in cochlear implant users with preserved acoustic hearing. *Hearing*  
749 *Research*, *350*, 45–57. <https://doi.org/10.1016/j.heares.2017.04.005>
- 750 Seyyedi, M., & Nadol, J. B. (2014). Intracochlear inflammatory response to cochlear  
751 implant electrodes in humans. *Otology and Neurotology*, *35*(9), 1545–1551.  
752 <https://doi.org/10.1097/MAO.0000000000000540>

- 753 Shepherd, R. K., Carter, P. M., Enke, Y. L., Wise, A. K., & Fallon, J. B. (2019). Chronic  
754 intracochlear electrical stimulation at high charge densities results in platinum  
755 dissolution but not neural loss or functional changes in vivo. *Journal of Neural*  
756 *Engineering*, *16*(2), aaf66b. <https://doi.org/10.1088/1741-2552/aaf66b>
- 757 Tan, W. J. T., Thorne, P. R., & Vlajkovic, S. M. (2016). Characterisation of cochlear  
758 inflammation in mice following acute and chronic noise exposure. *Histochemistry*  
759 *and Cell Biology*, *146*(2), 219–230. <https://doi.org/10.1007/s00418-016-1436-5>
- 760 Wilk, M., Hessler, R., Mugridge, K., Jolly, C., Fehr, M., Lenarz, T., & Scheper, V. (2016).  
761 Impedance Changes and Fibrous Tissue Growth after Cochlear Implantation Are  
762 Correlated and Can Be Reduced Using a Dexamethasone Eluting Electrode. *PLoS*  
763 *ONE*, *11*(2), 1–19. <https://doi.org/10.1371/journal.pone.0147552>
- 764 Wood, M. B., & Zuo, J. (2017). The contribution of immune infiltrates to ototoxicity and  
765 cochlear hair cell loss. *Frontiers in Cellular Neuroscience*, *11*(April), 1–7.  
766 <https://doi.org/10.3389/fncel.2017.00106>
- 767 Wynn, T. A., & Vannella, K. M. (2016). Macrophages in Tissue Repair, Regeneration,  
768 and Fibrosis. *Immunity*, *44*(3), 450–462.  
769 <https://doi.org/10.1016/j.immuni.2016.02.015>  
770
